# Supplementary material for: High purity λ-Ti3O5 prepared by Sc doping for enhanced microwave absorption
Source: Royal Society of Chemistry journal article supplement (doi:10.1039/d4tc02088j), 2024-01-01
Supplement: d4tc02088j1.pdf [file d4tc02088j1.pdf]

## Supplementary Information

**First-principles calculation.** The simulation was performed using the Vienna ab-initio simulation package (VASP) based on Heyd-Scuseria-Ernzerhof (HSE) screened hybrid functional. The Monkhorst-Pack scheme was applied in order to sample the Brillouin zone, and the interaction between the valence electrons and the core was depicted using the projected augmented wave (PAW) method. For the primitive cell model of  $\text{Ti}_3\text{O}_5$ , the plane wave cutoff of 660 eV and the k-point of  $9 \times 9 \times 5$  were used.

**Synthesis of  $\text{Sc}/\lambda\text{-Ti}_3\text{O}_5$ .** The main raw materials were purchased from Aladdin company, including  $\text{Sc}_2\text{O}_3$  (> 99.99 wt.%, CAS: 12060-08-1) and  $\text{TiO}_2$  (> 99.99 wt.%, CAS: 13463-67-7). The samples were prepared by hydrogen reduction method.  $\text{Sc}_2\text{O}_3$  and  $\text{TiO}_2$  were mixed homogeneously at 0.02-0.06 scandium-titanium atomic ratio, subsequently, they were put into quartz boats. The high-temperature tube furnace was used to treat the quartz boats in a 1200 °C under hydrogen atmosphere for an hour. In order to avoid the influence of the product of water vapor on the reaction rate, the flow rate of hydrogen gas was kept at 1.5 L/min in the process of high temperature reduction.

**Structure Characterization.** FESEM (Field-emission scanning electron microscopy, JEOL, JSM-7100F) and TEM (Transmission electron microscopy, JEOL, JEM-2100F) were used to analyze the morphology and microstructure of the  $\text{Sc}/\lambda\text{-Ti}_3\text{O}_5$ . XRD (X-ray diffraction was characterized by a Rigaku SmartLab X-ray diffractometer with  $\text{Cu K}\alpha$ ,  $\lambda=0.154$  nm, radiation at a voltage of 35 kV and a current of 200 mA at a scan step of  $0.04^\circ$ ) was used to characterize the structure of the  $\text{Sc}/\lambda\text{-Ti}_3\text{O}_5$ . XPS (X-ray photoelectron spectroscopy, Shimazu-Kratos Analytical Model Axis Supra) was used to test the chemical states of elements. VNA (Agilent PNA N5222A vector network analyzer) was used to test the electromagnetic parameters in the range of 2-18 GHz. The samples were uniformly mixed with the paraffin at a mass fraction of 50 wt.% of the microwave measurements.

Table S1. The optimized lattice parameters of  $\lambda\text{-Ti}_3\text{O}_5$  and  $\text{Sc}/\lambda\text{-Ti}_3\text{O}_5$  primitive cells.

|                     | $\lambda\text{-Ti}_3\text{O}_5$ | $\text{Sc}/\lambda\text{-Ti}_3\text{O}_5$ |
|---------------------|---------------------------------|-------------------------------------------|
| a (Å)               | 5.29526                         | 5.33128                                   |
| b (Å)               | 5.29526                         | 5.33128                                   |
| c (Å)               | 10.00901                        | 10.15964                                  |
| $\alpha$ (°)        | 91.2015                         | 90.6663                                   |
| $\beta$ (°)         | 91.2015                         | 90.6663                                   |
| $\gamma$ (°)        | 42.1844                         | 42.0826                                   |
| V (Å <sup>3</sup> ) | 188.414063                      | 193.514259                                |

Table S2. The optimized atomic coordinates of  $\lambda\text{-Ti}_3\text{O}_5$  and  $\text{Sc}/\lambda\text{-Ti}_3\text{O}_5$  primitive cells.

|     | $\lambda$ -Ti <sub>3</sub> O <sub>5</sub> |         |         | Sc/ $\lambda$ -Ti <sub>3</sub> O <sub>5</sub> |         |         |
|-----|-------------------------------------------|---------|---------|-----------------------------------------------|---------|---------|
|     | x/a                                       | y/b     | z/c     | x/a                                           | y/b     | z/c     |
| O1  | 0.44830                                   | 0.44830 | 0.38548 | 0.45266                                       | 0.45266 | 0.39028 |
| O2  | 0.17891                                   | 0.17891 | 0.06400 | 0.18704                                       | 0.18704 | 0.05966 |
| O3  | 0.73700                                   | 0.73700 | 0.25033 | 0.71946                                       | 0.71946 | 0.25058 |
| O4  | 0.54475                                   | 0.54475 | 0.86768 | 0.54871                                       | 0.54871 | 0.87322 |
| O5  | 0.18870                                   | 0.18870 | 0.42637 | 0.19022                                       | 0.19022 | 0.43689 |
| O6  | 0.55170                                   | 0.55170 | 0.61452 | 0.55035                                       | 0.55035 | 0.61953 |
| O7  | 0.82109                                   | 0.82109 | 0.93600 | 0.81885                                       | 0.81885 | 0.92822 |
| O8  | 0.26300                                   | 0.26300 | 0.74967 | 0.26641                                       | 0.26641 | 0.74961 |
| O9  | 0.45525                                   | 0.45525 | 0.13232 | 0.45327                                       | 0.45327 | 0.11666 |
| O10 | 0.81130                                   | 0.81130 | 0.57363 | 0.81190                                       | 0.81190 | 0.57446 |
| Ti1 | 0.62924                                   | 0.62924 | 0.04893 | 0.63304                                       | 0.63304 | 0.05162 |
| Ti2 | 0.30295                                   | 0.30295 | 0.24399 | \                                             | \       | \       |
| Ti3 | 0.63508                                   | 0.63508 | 0.43522 | 0.63597                                       | 0.63597 | 0.44215 |
| Ti4 | 0.37076                                   | 0.37076 | 0.95107 | 0.36939                                       | 0.36939 | 0.94016 |
| Ti5 | 0.69705                                   | 0.69705 | 0.75601 | 0.69707                                       | 0.69707 | 0.75208 |
| Ti6 | 0.36492                                   | 0.36492 | 0.56478 | 0.36569                                       | 0.36569 | 0.56550 |
| Sc  | \                                         | \       | \       | 0.29998                                       | 0.29998 | 0.24939 |
